# Supplementary material for: Effects of Auxin (Indole-3-butyric Acid) on Adventitious Root Formation in Peach-Based Prunus Rootstocks
Source: MDPI journal article supplement (doi:10.3390/plants11070913), 2022-03-29
Supplement: s1 [file s1]

**Table S1.** Regenerative parameters studied in this work.

| Experiment      | Parameter                  | Time of measuremet          | Units           |
|-----------------|----------------------------|-----------------------------|-----------------|
| Hydroponic      | Presence/absence of callus | 32, 50, 90 dap              | -               |
| Hydroponic      | % of callus response       | 32, 50, 90 dap              | %               |
| Hydroponic      | Presence/absence of AR     | 32, 50, 90 dap              | -               |
| Hydroponic      | % of AR response           | 32, 50, 90 dap              | %               |
| Hydroponic      | AR number                  | 32, 50, 90 dap              | -               |
| Hydroponic      | Callus stage               | 90 dap                      | -               |
| Hydroponic      | Callus area                | 90 dap                      | cm <sup>2</sup> |
| Hydroponic      | AR max. length             | 90 dap                      | cm              |
| <i>In vitro</i> | Presence/absence of callus | 7, 8, 9, 13, 15, 20, 30 dae | -               |
| <i>In vitro</i> | % of callus response       | 7, 8, 9, 13, 15, 20, 30 dae | %               |
| <i>In vitro</i> | Presence/absence of AR     | 7, 8, 9, 13, 15, 20, 30 dae | -               |
| <i>In vitro</i> | % of AR response           | 7, 8, 9, 13, 15, 20, 30 dae | %               |
| <i>In vitro</i> | AR number                  | 7, 8, 9, 13, 15, 20, 30 dae | -               |
| <i>In vitro</i> | AR max. length             | 20 dae                      | mm              |
