# Supplementary material for: Effects of Auxin (Indole-3-butyric Acid) on Adventitious Root Formation in Peach-Based Prunus Rootstocks
Source: MDPI journal article supplement (doi:10.3390/plants11070913), 2022-03-29
Supplement: s1 [file s1]

Figure S5

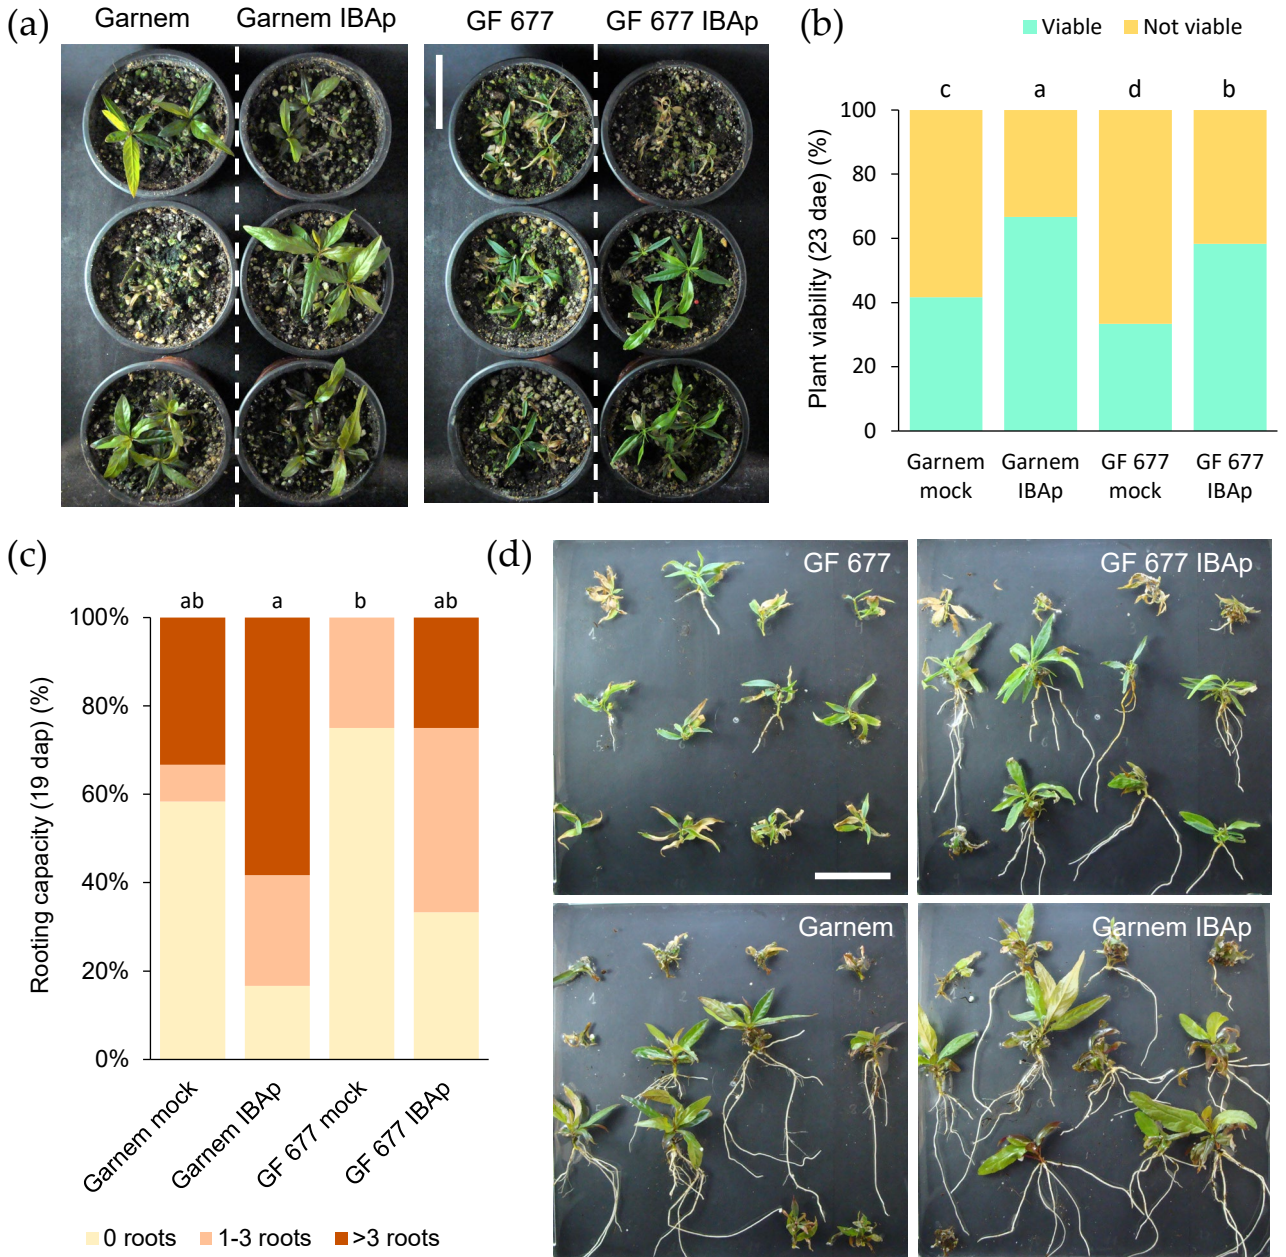

**Figure S5.** *Ex vitro* acclimation of *Prunus* microcuttings after IBAP treatment. (a) Plant growing after four days at *in vitro* conditions and 19 days at soil conditions. Scale bar: 5 cm. (b) Plant viability percentage in each condition. (c) Rooting capacity of each genotype and condition after 19 dap / 23 dae. Letters indicate significant differences ( $p$ -value < 0.01) for the average AR number between the genotypes studied. Sample number is 12. (d) Representative images of the four studied conditions. Scale bar: 5 cm.
