# Supplementary material for: Effects of Auxin (Indole-3-butyric Acid) on Adventitious Root Formation in Peach-Based Prunus Rootstocks
Source: MDPI journal article supplement (doi:10.3390/plants11070913), 2022-03-29
Supplement: s1 [file s1]

Figure S2

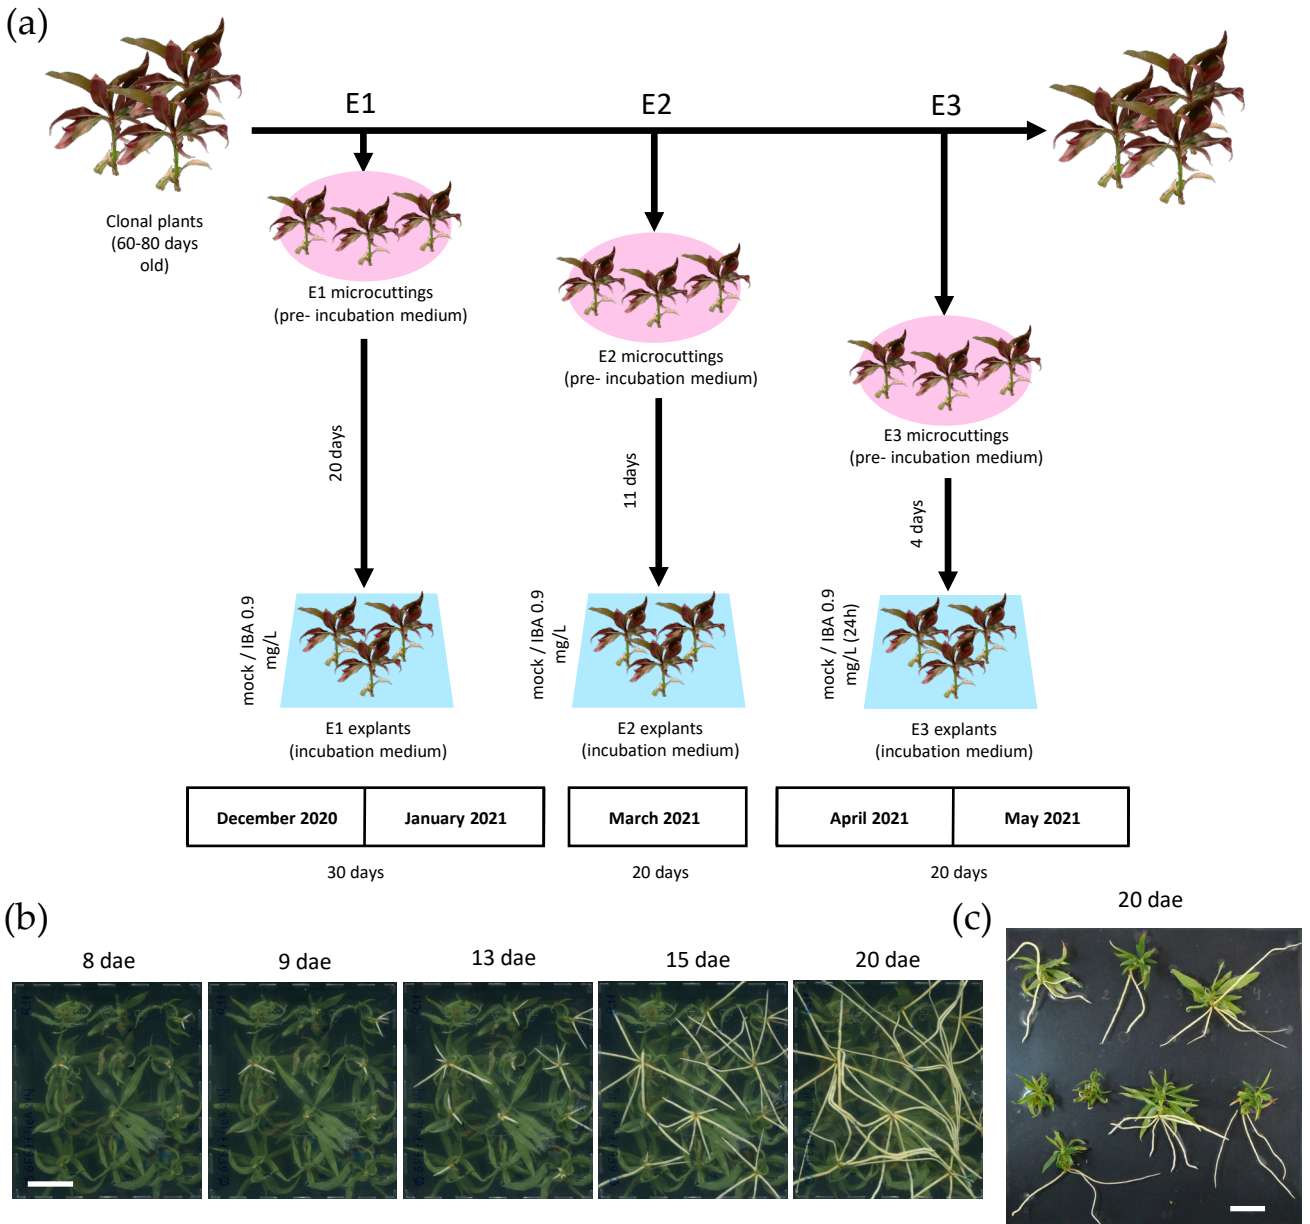

**Figure S2.** Adventitious rooting evaluation in *Prunus* at *in vitro* culture. (a) Experimental design established for adventitious root characterization in Garnem and GF 677 microcuttings at *in vitro* growing conditions by three different experiments (E1, E2 and E3). (b) Representative images of the time-series scans at different time points at *in vitro* experiments and (c) final images of regenerated microcuttings. Scale bars 25 mm.
