# Supplementary material for: Effects of Auxin (Indole-3-butyric Acid) on Adventitious Root Formation in Peach-Based Prunus Rootstocks
Source: MDPI journal article supplement (doi:10.3390/plants11070913), 2022-03-29
Supplement: s1 [file s1]

Figure S6

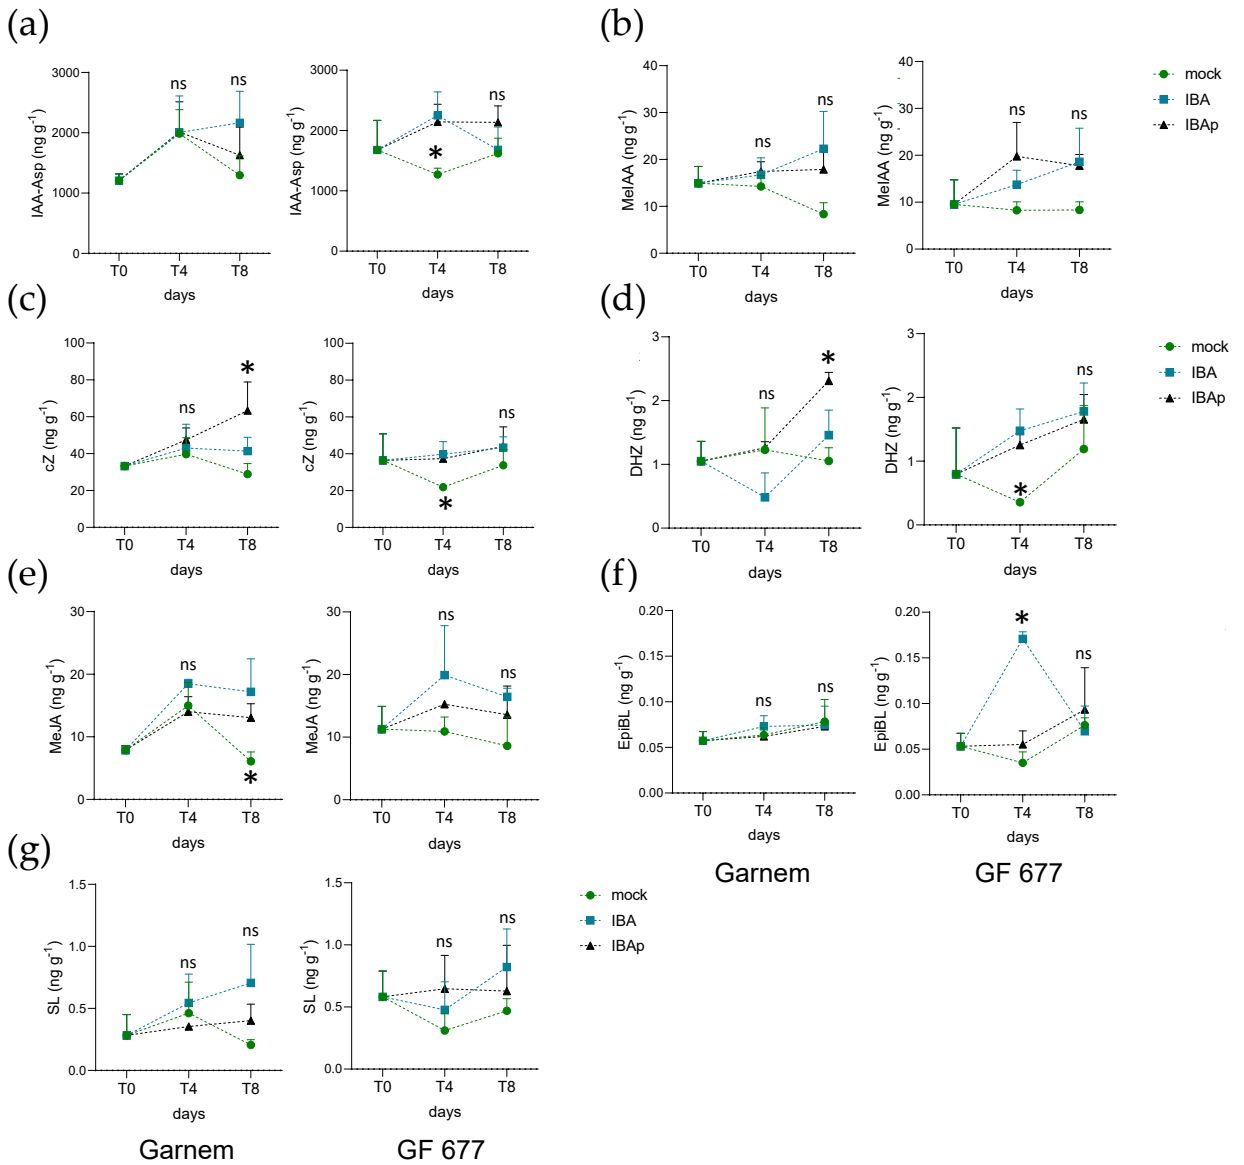

**Figure S6.** Hormonal profiling of Garnem and GF 677 microcuttings during IBA-induced rooting (II). Endogenous levels of (a) indole-3-acetyl-aspartate (IAA-Asp), (b) methyl indole-3-acetic acid (MeIAA), (c) cis-zeatin (cZ), (d) dihydrozeatin (DHZ), (e) methyl jasmonate (MeJA), (f) epi-brassinolide (EpiBL) and (g) solanacol (SL) measured in the basal region of Garnem (left panels) and GF 677 (right panels) microcuttings at 0, 4 and 8 dae. Asterisks indicate statistically significant differences (p-value < 0.01) among treatments at the same time point, ns= no statistically significant differences (p-value > 0.01).
