# Supplementary material for: Effects of Auxin (Indole-3-butyric Acid) on Adventitious Root Formation in Peach-Based Prunus Rootstocks
Source: MDPI journal article supplement (doi:10.3390/plants11070913), 2022-03-29
Supplement: s1 [file s1]

Figure S1

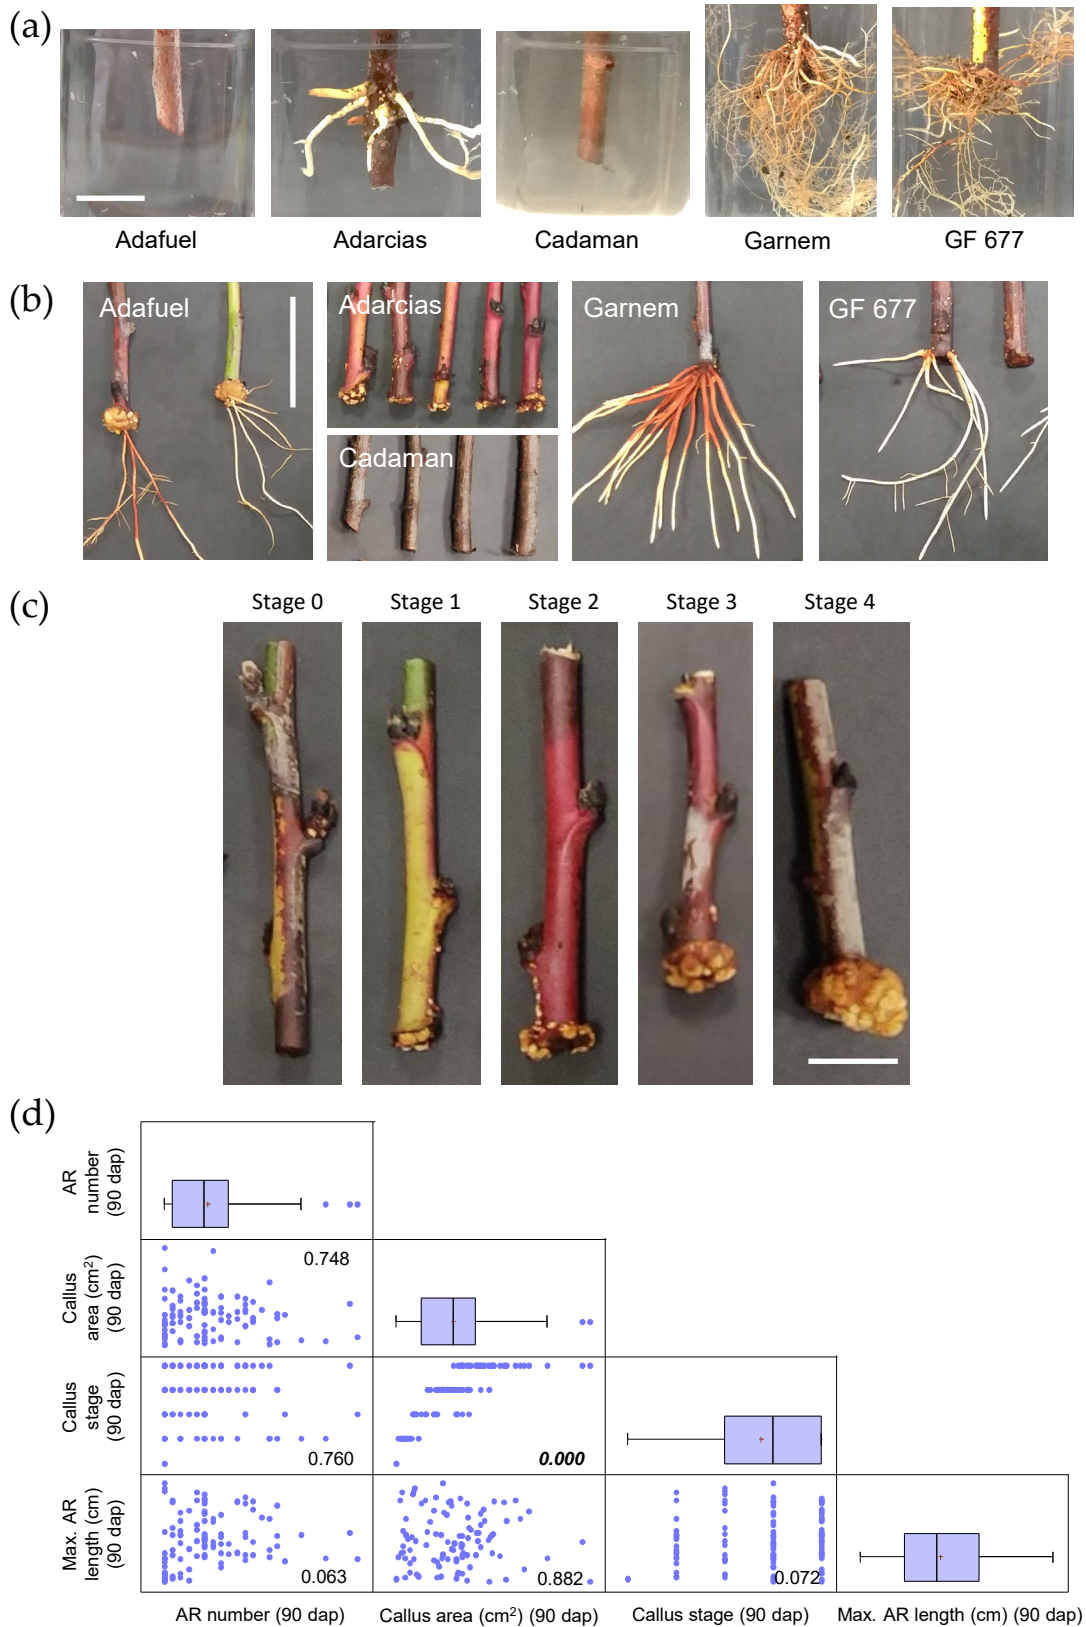

**Figure S1.** Regenerative response of studied *Prunus* rootstocks and correlation among different regeneration parameters. (a) Representative images of five *Prunus* rootstocks at 82 days after growing in soil conditions. Scale bar: 2.5 cm. (b) Representative images of the basal part of studied *Prunus* rootstocks at 90 dap. Scale bar: 5 cm. (c) Different callus stages were established in order to define the regeneration capacity at the basal part of the cuttings. Scale bar: 15 mm. (d) Multiple correlation analysis was performed among regeneration parameters measured at 90 dap after hydroponic culture, with only a statistically significant correlation (p-value < 0.05) between callus area and callus stage parameters.
